# Supplementary material for: Using Social Media Data to Research the Impact of Campus Green Spaces on Students’ Emotions: A Case Study of Nanjing Campuses
Source: MDPI journal article supplement (doi:10.3390/su16020691), 2024-01-12
Supplement: s1 [file s1]

## Supplementary Materials

**Table S1.** Examples of green visual index data summary on campuses.

| Campus number | Campus name                                               | GVI in Spring | Number of observation points | Number of valid images |
|---------------|-----------------------------------------------------------|---------------|------------------------------|------------------------|
| 1             | Southeast University, Jiulonghu Campus                    | 40.82%        | 3729                         | 14916                  |
| 2             | Southeast University, Sipailou Campus                     | 36.30%        | 2289                         | 9156                   |
| 3             | Hohai University, Jiangning Campus                        | 36.21%        | 887                          | 3548                   |
| 4             | Nanjing University of Finance & Economics, Xianlin Campus | 38.17%        | 1041                         | 4164                   |
| 5             | Nanjing Normal University, Xianlin Campus                 | 33.99%        | 1106                         | 4424                   |
| 6             | Nanjing University Jiling College                         | 43.75%        | 640                          | 2560                   |
| ...           | ...                                                       | ...           | ...                          | ...                    |

**Table S2.** Classification and definition of campus green space types.

| Types                          | Definition                                                                                                                                                                   |
|--------------------------------|------------------------------------------------------------------------------------------------------------------------------------------------------------------------------|
| Large recreational green space | A large centralized public space with a beautiful landscape and some open space facilities for students to enter and relax, with an area of not less than 5hm <sup>2</sup> . |
| Small recreational green space | Small spaces with access for students to relax, less than 5hm <sup>2</sup> and more than 100m <sup>2</sup> .                                                                 |
| Public activity plazas         | Plazas available for student access to activities.                                                                                                                           |
| Green space on roads           | Lawns, trees and mixed greenery on both sides of roads.                                                                                                                      |
| Forest green space             | No access to the woods for recreation.                                                                                                                                       |

**Table S3.** Examples of results of emotion analysis.

| Time               | Element             | Longitude | Latitude | Positivity level % | Negativity level % | Emotional index | Confidence % |
|--------------------|---------------------|-----------|----------|--------------------|--------------------|-----------------|--------------|
| 2019/5/28<br>17:41 | Gourmet from Leshan | 118.7863  | 32.0793  | 99.17              | 0.83               | 2               | 98.16        |

| Time                | Element                                                                                                                                                                                                                                                                                       | Longitude | Latitude | Positivity level % | Negativity level % | Emotional index | Confidence % |
|---------------------|-----------------------------------------------------------------------------------------------------------------------------------------------------------------------------------------------------------------------------------------------------------------------------------------------|-----------|----------|--------------------|--------------------|-----------------|--------------|
| 2018/10/28<br>9:06  | The tenth time a cat dies, the tenth time I'm disappointed is when I don't love you.                                                                                                                                                                                                          | 118.8951  | 31.8899  | 6.96               | 93.04              | 0               | 84.54        |
| 2021/4/15<br>19:32  | I slept for three hours from the east side of the city to the west side of the river for an interview and then from the west side of the river back to the school for a vaccination and then go to the west side of the river for an interview and then go back to the east side of the city. | 118.8951  | 31.8899  | 90.96              | 9.04               | 2               | 79.92        |
| 2021/06/09<br>09:48 | Don't wear yourself out with any relationship other than a blood relationship that can be broken at the drop of a hat.                                                                                                                                                                        | 118.8501  | 32.0389  | 0.07               | 99.93              | 0               | 99.85        |
| 2021/5/27<br>13:36  | Life as it is ~ really too good (three dishes for two people, the chicken wings were a gift from a later event) just love the shredded pork with fish!                                                                                                                                        | 118.6483  | 32.0874  | 99.94              | 0.06               | 2               | 99.88        |
| 2016/3/18<br>23:05  | Today actually played a wave of wheel battle with the freshmen, it is true that they are not strong sense of combat, but also need to practice more, a long time did not play the actual battle this time to play or can also let myself surprised.                                           | 118.8889  | 31.9313  | 48.15              | 51.85              | 1               | 63.03        |
| 2016/3/8 20:46      | The wind whooshed ah, waiting for the traffic light froze and blew me away from the side of the small friends, I secretly moved back!                                                                                                                                                         | 118.9282  | 32.1137  | 55.53              | 34.47              | 1               | 73.39        |
| 2019/10/21<br>23:28 | Come on, let's find out where this is.                                                                                                                                                                                                                                                        | 118.9668  | 32.1179  | 62.10              | 27.90              | 2               | 58.01        |
