# Supplementary material for: Using Social Media Data to Research the Impact of Campus Green Spaces on Students’ Emotions: A Case Study of Nanjing Campuses
Source: MDPI journal article supplement (doi:10.3390/su16020691), 2024-01-12
Supplement: s1 [file s1]

Archive with 1 entries (1 files):
- sustainability-2773662-supplementary.pdf
